# Supplementary material
Source: publisher figshare collection journal article supplement (https://acs.figshare.com/ndownloader/files/4108753)
Supplement: Supplementary file 1 [file 4108753]

## Supporting Information

### Haloarene derivatives of carbamazepine with reduced bioactivation liabilities:

#### 2-monohalo and 2,8-dihalo derivatives

Emma-Claire Elliott,<sup>†</sup> Sophie L. Regan,<sup>‡</sup> James L. Maggs,<sup>‡</sup> Elizabeth R. Bowkett,<sup>†</sup> Laura J. Parry,<sup>†</sup>  
Dominic P. Williams,<sup>‡</sup> B. Kevin Park,<sup>\*,‡</sup> and Andrew V. Stachulski<sup>\*,†</sup>

<sup>†</sup>Department of Chemistry, University of Liverpool, Liverpool L69 7ZD, U.K.

<sup>‡</sup>MRC Centre for Drug Safety Science, Institute of Translational Medicine, University of Liverpool,  
Liverpool L69 3GE, U.K.

\*For A.V.S.: phone, +44 0151 794 3482; Fax, +44 0151 794 3488; E-mail, [stachuls@liv.ac.uk](mailto:stachuls@liv.ac.uk).

\*For B.K.P.: phone, +44 0151 794 5559; fax, +44 0151 794 5540; E-mail, [b.k.park@liv.ac.uk](mailto:b.k.park@liv.ac.uk).

### List of Contents

S1. Contents

S2-S3. Characterisation data for compounds **7b-d** and **6d-f**

S4. <sup>1</sup>H NMR spectrum of the transformation of **9d** to **11d** and **12d**

S5-S7. Mass chromatograms of monooxygenated metabolites of **1** and **5a-c** in rat hepatocytes

S8-S9. Mass chromatograms for GSH adducts of **1**, **5a** and **5b** in rat hepatocytes

S10. Mass chromatograms of monooxygenated metabolites of **1** and **5b** in human liver microsomes

S11-S14. Mass spectra of the metabolites of **1** and derivatives **5a-f**

S15. Reference

**Characterization data for compounds 7b-d and 6d-f.**

**2,8-Dichloro-10,11-dihydro-5H-dibenz[*b,f*]azepine (7b).** This compound was obtained in 80% yield as a beige solid, mp. 114-115°C;  $^1\text{H}$  NMR [400 MHz,  $(\text{CD}_3)_2\text{CO}$ ]  $\delta$  7.93 (s, 1H, NH), 7.08-7.07 (d, 2H,  $J=2.4$  Hz, 1-H + 9-H), 7.06-7.04 (dd, 2H,  $J=8.4, 2.5$  Hz, 3-H + 7-H), 6.97-6.95 (d, 2H,  $J=8.48$  Hz, 4-H + 6-H) and 2.89 (s, 4H,  $\text{CH}_2\text{CH}_2$ );  $^{13}\text{C}$  NMR [101 MHz,  $(\text{CD}_3)_2\text{CO}$ ]  $\delta$  141.0, 130.1, 129.4, 125.4, 123.6, 120.9 and 32.5;  $\nu_{\text{max.}}(\text{cm}^{-1})$  3399.9 (m, NH), 1484 (s), 1330(m) and 802.2 (m);  $m/z$  (ES +ve mode) 263 ( $[\text{M}+\text{H}]^+$ , 100%), 265 (64%) and 266 (12%); HRMS: found,  $m/z$  264.0341;  $\text{C}_{14}\text{H}_{12}^{35}\text{Cl}_2\text{N}$  ( $\text{MH}^+$ ) requires  $m/z$  264.0347.

**2-Bromo-10,11-dihydro-5H-dibenz[*b,f*]azepine (7c).** This compound was obtained in 62% yield as a white powder, mp. 102-103°C (lit.<sup>32</sup> mp. 100-101°C);  $^1\text{H}$  NMR (400 MHz,  $\text{CDCl}_3$ )  $\delta$  7.12 - 7.17 (m, 1 H, 1-H), 7.01-7.11 (m, 3 H), 6.68 - 6.84 (m, 3 H), 5.96 (br s, 1 H, NH) and 3.00 - 3.10 (m, 4 H,  $\text{CH}_2\text{CH}_2$ );  $^{13}\text{C}$  NMR (101 MHz,  $\text{CDCl}_3$ )  $\delta$  142.4, 141.6, 133.0, 130.7, 129.5, 128.6, 128.5, 126.9, 119.9, 119.4, 117.9, 111.2, 34.7 and 34.6;  $\nu_{\text{max.}}(\text{cm}^{-1})$  3386 (w, NH), 1484 (s), 1457 (m, Ar C=C stretch) and 802 (m);  $m/z$  (CI) 274 ( $[\text{MH}]^+$ , 100%) and 276 (97%).

**2,8-Dibromo-10,11-dihydro-5H-dibenz[*b,f*]azepine (7d).** This compound was obtained in 78% yield as pale blue needles, mp. 154-155°C (lit.<sup>32</sup> mp. 177-178°C);  $^1\text{H}$  NMR (400 MHz,  $\text{CDCl}_3$ )  $\delta$  7.14 - 7.18 (dd,  $J=9.1, 2.4$  Hz, 2 H, 3-H + 7-H), 7.13 (d,  $J=2.4$  Hz, 2 H, 1-H + 9-H), 6.60 (d,  $J=9.1$  Hz, 2 H, 4-H + 6-H), 5.95 (br s, 1 H, NH) and 3.01 (s, 4 H,  $\text{CH}_2\text{CH}_2$ );  $^{13}\text{C}$  NMR (101 MHz,  $\text{CDCl}_3$ )  $\delta$  141.0, 133.1, 130.4, 129.6, 119.6, 111.7 and 34.3;  $\nu_{\text{max.}}(\text{cm}^{-1})$  3402 (w, NH), 1485 (m), 1342 (m) and 802 (m);  $m/z$  (ES-ve mode) 350 ( $[\text{M}-\text{H}]^-$ , 51%), 351 (100%) and 353 (49%).

**2,8-Dichloro-5H-dibenz[*b,f*]azepine (6d).** This was similarly obtained as an orange solid in near quantitative yield;  $^1\text{H}$  NMR (400 MHz,  $\text{CDCl}_3$ )  $\delta$  6.99 (dd,  $J=8.4, 2.4$  Hz, 2 H), 6.84 (d,  $J=2.5$  Hz, 2 H), 6.42 (d,  $J=8.4$  Hz, 2 H), 6.25 (s, 2 H) and 4.89 (br s, 1 H);  $^{13}\text{C}$  NMR (101 MHz,  $\text{CDCl}_3$ )  $\delta$  146.6, 132.0, 131.0, 130.1, 129.2, 128.3 and 120.4; HRMS: found,  $m/z$  262.0186;  $\text{C}_{14}\text{H}_{10}\text{N}^{35}\text{Cl}_2$  ( $\text{MH}^+$ ) requires  $m/z$  262.0190.

**2-Bromo-5H-dibenz[*b,f*]azepine (6e).** This could only be obtained as a mixture with a presumed positional isomer by the above method; it was converted to the carbamazepine analogue **5e** (see below) after final separation by preparative HPLC. Instead **6e** could be obtained in very low yield (5%), but high purity, via acid-catalysed rearrangement of 5-bromo-1-phenyl-1H-indole (see Results and Discussion: Chemistry),<sup>35, 42</sup> affording **6e** as an orange solid, mp. 152-154°C;  $^1\text{H}$  NMR (400 MHz,  $\text{CDCl}_3$ )  $\delta$  7.09 (dd,  $J=8.3, 2.3$  Hz, 1 H), 7.03 (ddd,  $J=7.9, 5.9, 3.1$  Hz, 2 H), 6.95 (d,  $J=2.3$  Hz, 1 H), 6.82 - 6.86 (m, 1 H), 6.46 (d,  $J=7.6$  Hz, 1 H), 6.35 (s, 1 H), 6.30 (d,  $J=12.0$  Hz, 1 H), 6.17 (d,  $J=11.6$  Hz, 1 H) and 4.89 (br s, 1 H);  $^{13}\text{C}$  NMR (101 MHz,  $\text{CDCl}_3$ )  $\delta$  148.3, 147.4, 133.4, 132.8, 131.8, 131.7, 130.7, 130.6, 129.8, 129.3, 123.3, 120.7, 119.3 and 115.3;  $m/z$  (CI) 272 ( $[\text{M}+\text{H}]^+$ , 97%) and 274 (100%); HRMS: found,  $m/z$  270.9991;  $\text{C}_{14}\text{H}_{10}\text{N}^{79}\text{Br}$  ( $\text{M}^+$ ) requires  $m/z$  270.9997.

**2,8-Dibromo-5H-dibenz[*b,f*]azepine (6f).** This was obtained as an orange solid in near quantitative yield;  $^1\text{H}$  NMR (400 MHz,  $\text{CDCl}_3$ )  $\delta$  7.12 (dd,  $J = 2.3, 8.3$  Hz, 2 H, 3-H and 7-H), 6.96 (d,  $J = 2.3$  Hz, 2 H, 1-H and 9-H), 6.34 (d,  $J = 8.4$  Hz, 2 H, 4-H and 6-H) and 6.21 (s, 2 H, 10-H and 11-H) and 4.88 (br s, 1 H, NH);  $m/z$  (EI-ve mode) 348 ( $[\text{M}-\text{H}]^-$ , 51%), 350 (100%) and 352 (49%); HRMS: found,  $m/z$  347.9031;  $\text{C}_{14}\text{H}_8\text{N}^{79}\text{Br}_2$  ( $\text{M}-\text{H}^-$ ) requires  $m/z$  347.9023.

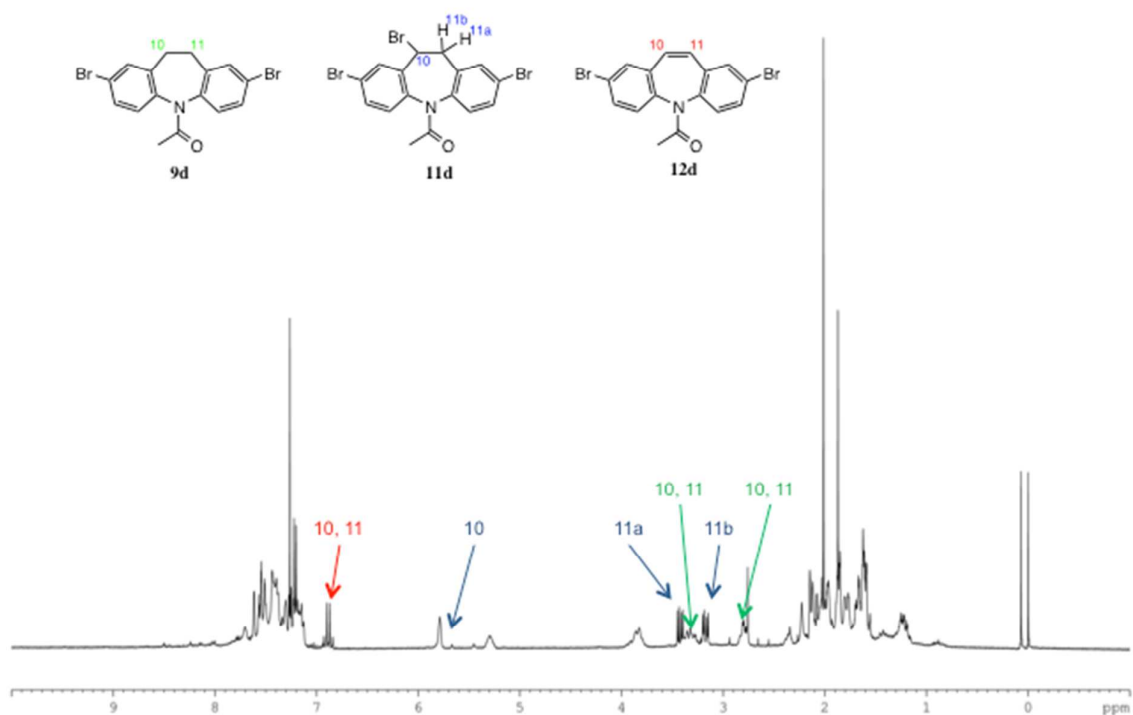

**Figure S1.**  $^1\text{H}$  NMR spectrum of crude reaction mixture at 12 h during the radical bromination-elimination transformation of *N*-acetyl-2,8-dibromo-10,11-dihydro-5H-dibenz[*b,f*]azepine **9d** to **11d** and **12d**. At an intermediate stage, unreacted **9d**, **11d** and **12d** were all distinct. A characteristic ABX pattern was obtained from the C10 and C11 protons of 10-Br intermediate **11d**, with disappearance of the complex  $\text{CH}_2\text{CH}_2$  multiplet (fluxional effects) of **9d**. Partial formation of the 10,11-double bond in **12d** at this stage was apparent from the appearance of an AB qt at  $\delta$  6.90. The radical bromination was continued until the  $-\text{CH}_2\text{CH}_2-$  signals of **9d** had disappeared. Treatment of the substantially pure **11d**, containing some **12d**, with excess KOH/EtOH afforded highly pure 2,8-dibromodibenz[*b,f*]azepine **6f**.

## Mass chromatograms of monooxygenated metabolites of **1** and **5a-c** in rat hepatocytes

Positive-ion electrospray mass chromatograms of the monooxygenated metabolites of **1** (**2-4**) and derivatives **5a** (2-fluoro), **5b** (2,8-difluoro) and **5c** (2-chloro) were obtained by LC/MS. **5a** was the only derivative that underwent aryl hydroxylation – and subsequent complete *O*-sulfonation – by isolated male rat hepatocytes (Supplementary Table 2). C-2/C-8 difluorination and C-2 chlorination were the minimum halogen substitutions required to block aryl hydroxylation of **1**. With **5a-c**, the principal search criterion for an aryl hydroxyl metabolite, by analogy with fragmentations of authentic standards of 2-hydroxy **2** and 3-hydroxy **4**, was neutral loss of 43 amu ( $[M+H-CONH]^+$ ) from a monooxygenated derivative of the parent in the absence of coincidental loss of 30 amu ( $CH_2O$ ) characteristic of a 10,11-epoxide (Supplementary Tables 1-7). Metabolites were produced by 6-h incubations with 50  $\mu$ M substrate.

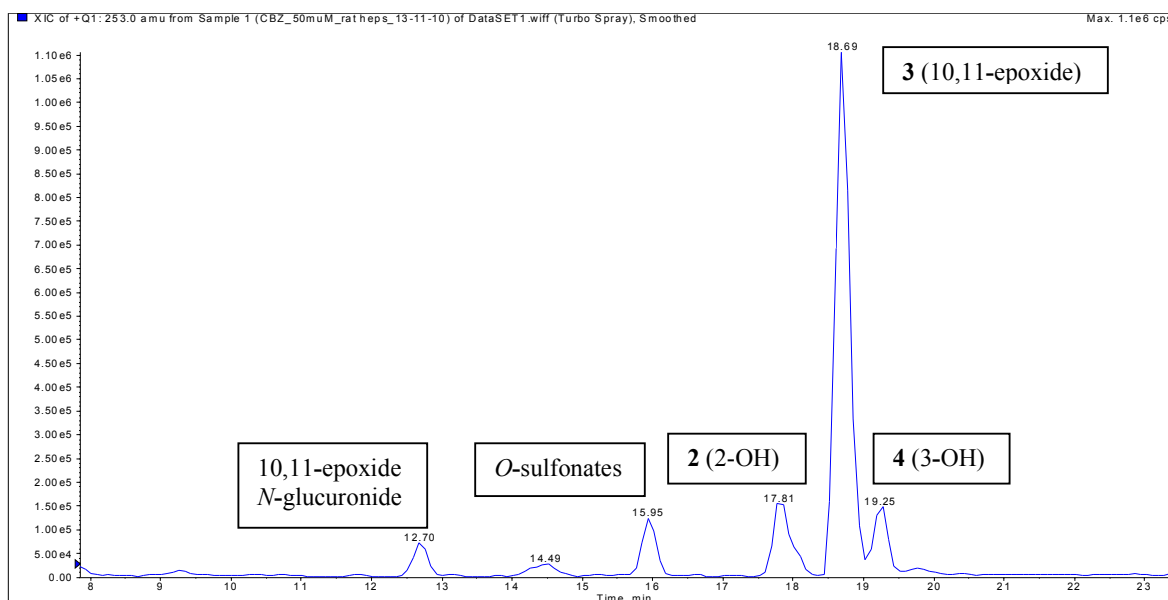

**Figure S2.** Mass chromatogram of the monooxygenated metabolites of **1** ( $[M+H]^+$  at  $m/z$  253; **2-4**). The additional peaks at 14.49 min and 15.95 min, attributed to *O*-sulfonates of **1**, were fragment ions ( $[M+H-SO_3]^+$ ) of the minor and major *O*-sulfonates (regiochemistry undefined), respectively. The peak at 12.7 min attributed to the *N*-glucuronide of **3** was a fragment ion ( $[M+H-176]^+$ ).

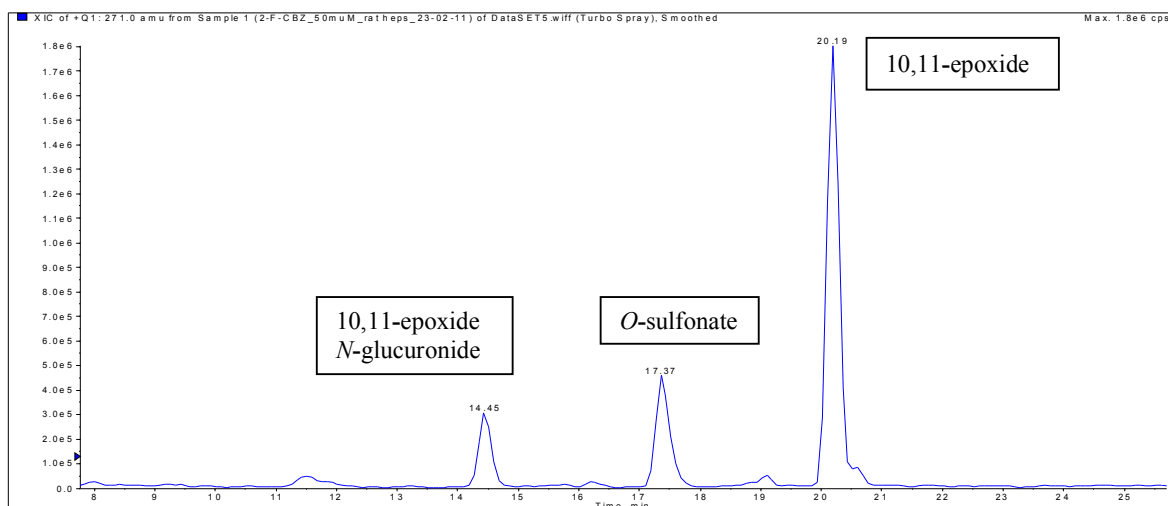

**Figure S3.** Mass chromatogram of the monooxygenated metabolites of **5a** ( $[M+H]^+$  at  $m/z$  271). The additional peaks at 14.45 min and 17.37 min, attributed to the *N*-glucuronide of the **5a** 10,11-epoxide and an *O*-sulfonate (regiochemistry unknown), respectively, were fragment ions:  $[M+H-176]^+$  and  $[M+H-SO_3]^+$ , respectively.

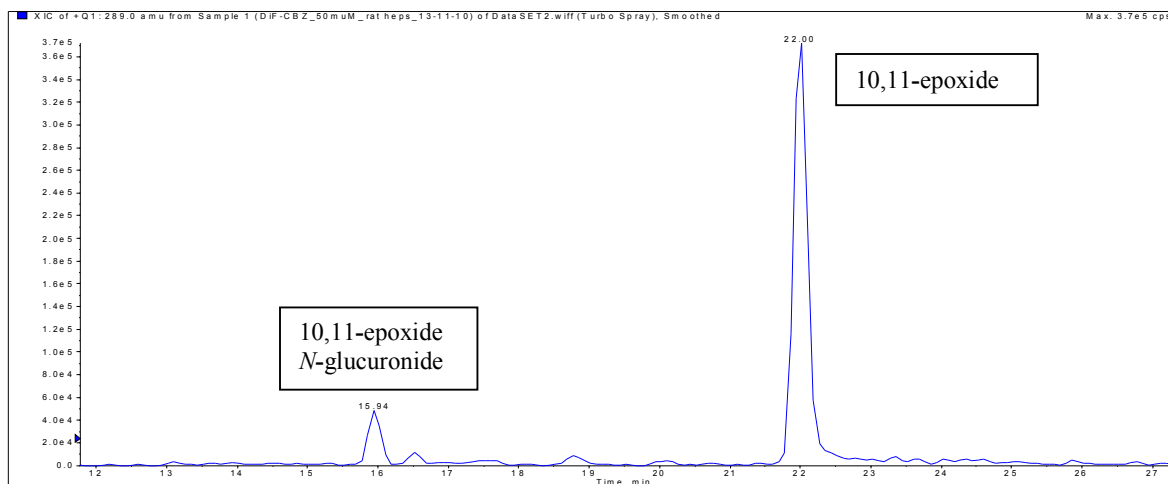

**Figure S4.** Mass chromatogram of the monooxygenated metabolites of **5b** ( $[M+H]^+$  at  $m/z$  289). The additional peak at 15.94 min attributed to the *N*-glucuronide of the **5b** 10,11-epoxide was a fragment ion ( $[M+H-176]^+$ ).

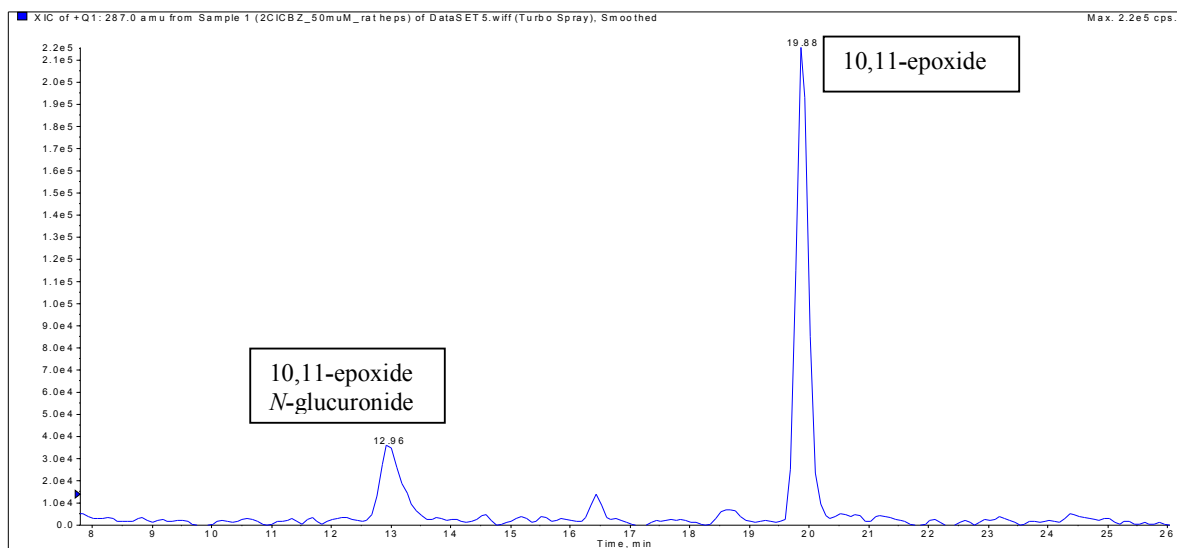

**Figure S5.** Mass chromatogram of the monooxygenated metabolites of **5c** ( $[M+H]^+$  at  $m/z$  287;  $^{35}\text{Cl}$  isotope form). The additional peak at 12.96 min attributed to the *N*-glucuronide of the **5c** 10,11-epoxide was a fragment ion ( $[M+H-176]^+$ ).

### Mass chromatograms for GSH adducts of **1**, **5a** and **5b** in rat hepatocytes

Positive-ion electrospray mass chromatograms for GSH adducts of **1** and derivatives **5a** (2-fluoro) and **5b** (2,8-difluoro) were obtained by LC/MS. Only **1** yielded an adduct as specified below.

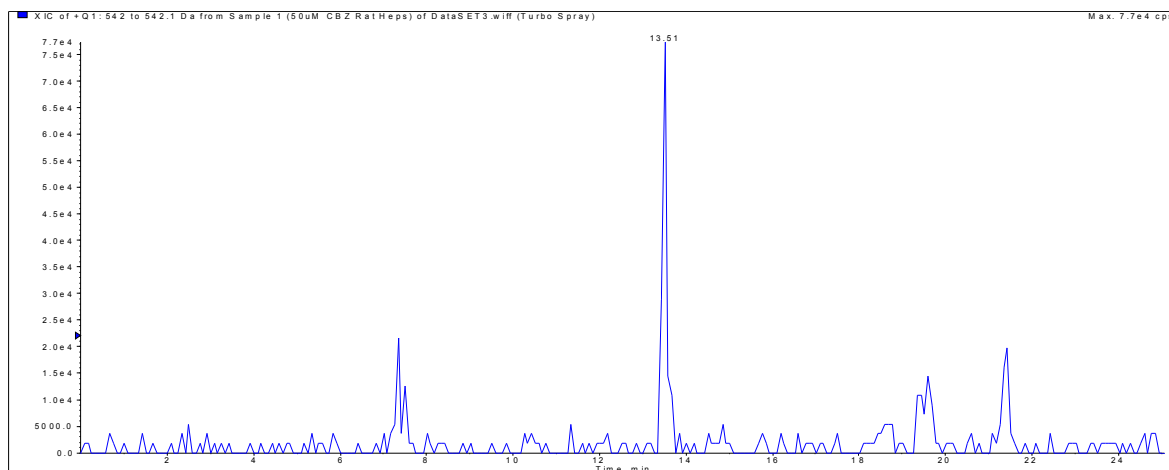

**Figure S6.** Mass chromatogram for the M-2H+GSH adduct of **1** ( $[M+H]^+$  at  $m/z$  542; peak at 13.51 min). Spectrum (Table S1) contained diagnostic fragments at  $m/z$  467 ( $[M+H\text{-glycine}]^+$ ) and  $m/z$  413 ( $[M+H\text{-pyroglutamate}]^+$ ).

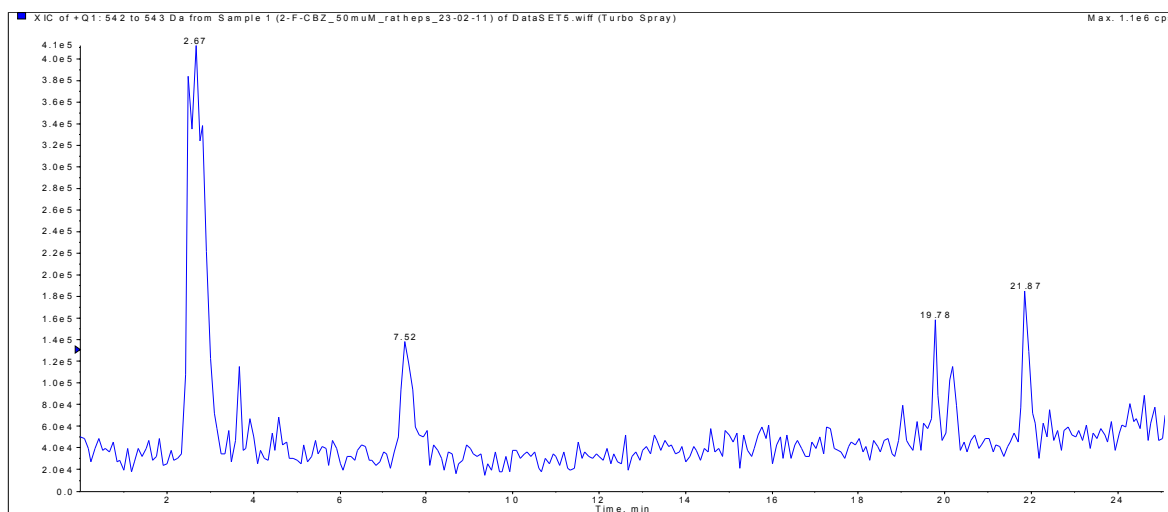

**Figure S7.** Mass chromatogram for the M-HX+GSH adduct of **5a** ( $[M+H]^+$  at  $m/z$  542).



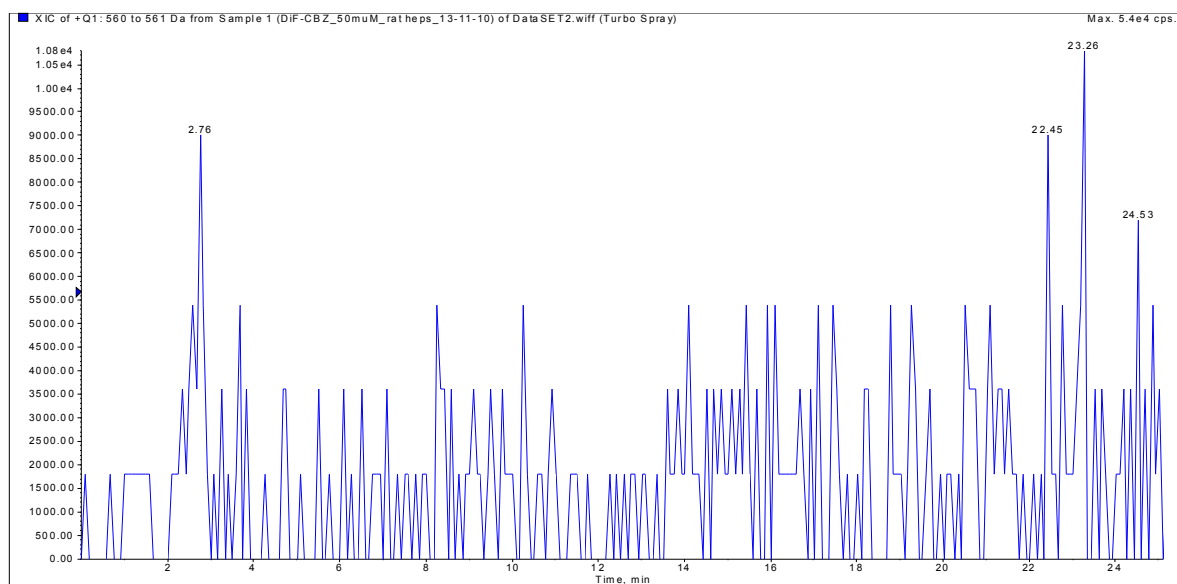

**Figure S8.** Mass chromatogram for the M-HX+GSH adduct of **5b** ( $[M+H]^+$  at  $m/z$  560).

**Mass chromatograms of monooxygenated metabolites of 1 and 5b in human liver microsomes**

Positive-ion electrospray mass chromatograms of the monooxygenated metabolites of **1** (**2-4**) and derivative **5b** (2,8-difluoro) were obtained by LC/MS. **5b** was refractory to arene oxidation. The only detected monooxygenated metabolite of **5b** yielded the neutral losses of 43 amu ( $[M+H-CONH]^+$ ) and 30 amu ( $CH_2O$ ) characteristic of a 10,11-epoxide. Metabolites were produced by 60-min incubations with 50  $\mu$ M substrate.

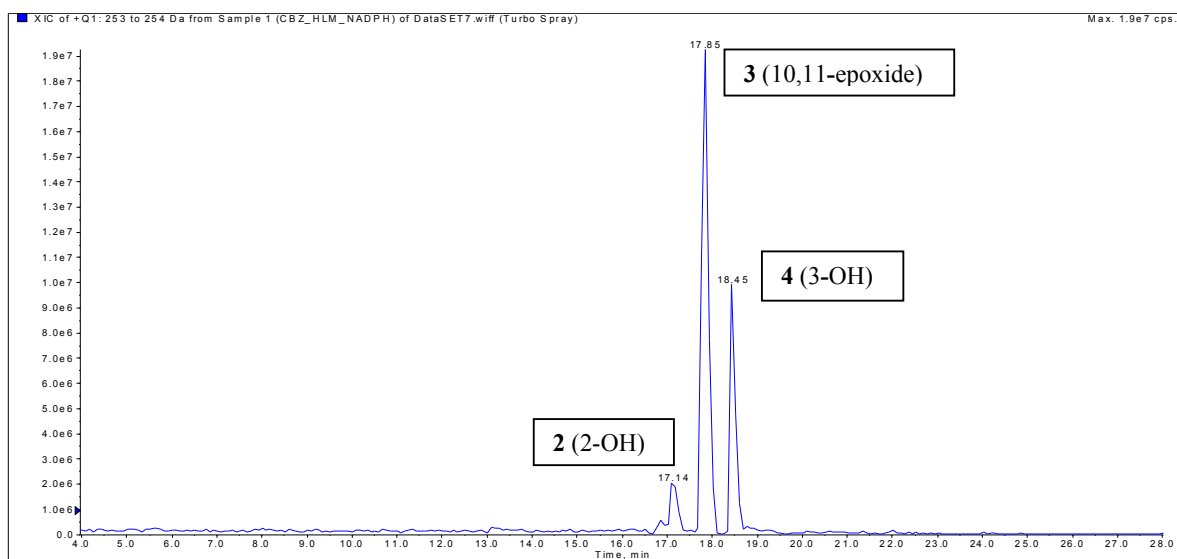

**Figure S9.** Mass chromatogram of the monooxygenated metabolites of **1** ( $[M+H]^+$  at  $m/z$  253; **2-4**).

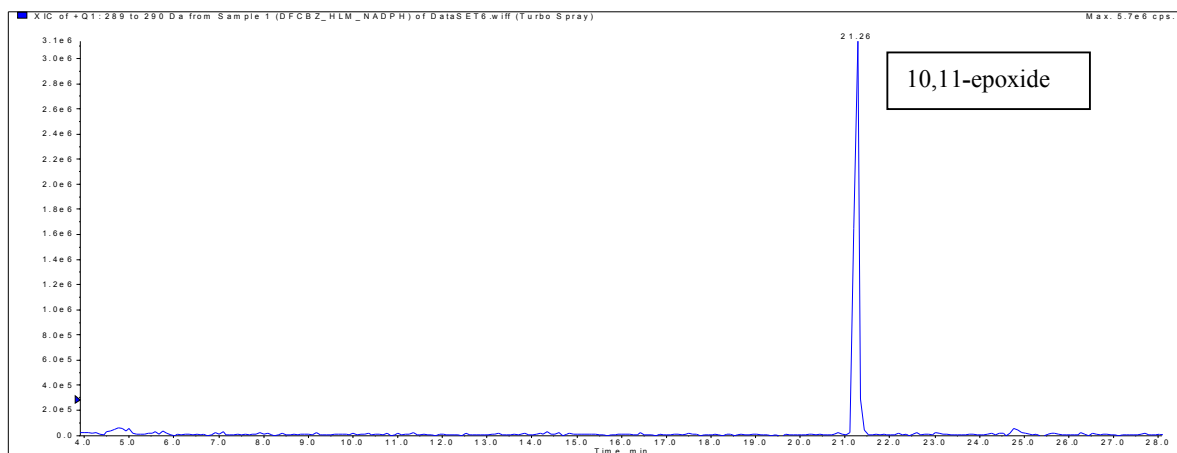

**Figure S10.** Mass chromatogram of the monooxygenated metabolite of **5b** ( $[M+H]^+$  at  $m/z$  289).

### Mass spectra of metabolites

Positive-ion electrospray mass spectra of the metabolites of **1** and derivatives **5a-f** were obtained by LC/MS. The metabolites were produced by isolated male rat hepatocytes incubated with substrate (50  $\mu$ M) for 6 h.

**Table S1.** Mass spectra of metabolites of **1**

| Metabolite                                          | Mass spectrum ( $m/z$ )                                                                                                                                                                  |
|-----------------------------------------------------|------------------------------------------------------------------------------------------------------------------------------------------------------------------------------------------|
| 10,11-epoxide ( <b>3</b> )                          | 253 ( $[M+H]^+$ ), 236 ( $[M+H-NH_3]^+$ ), 210 ( $[M+H-CONH]^+$ ), 180 ( $[210-CH_2O]^+$ )                                                                                               |
| 2-hydroxyl ( <b>2</b> )                             | 253 ( $[M+H]^+$ ), 210 ( $[M+H-CONH]^+$ )                                                                                                                                                |
| 3-hydroxyl ( <b>4</b> )                             | 253 ( $[M+H]^+$ ), 210 ( $[M+H-CONH]^+$ )                                                                                                                                                |
| <i>N</i> -glucuronide <sup>a</sup>                  | 413 ( $[M+H]^+$ ), 395 ( $[M+H-H_2O]^+$ ), 377 ( $[M+H-2H_2O]^+$ ), 303 ( $[395-92]^+$ ), 279 ( $[M+H-134]^+$ ), 237 ( $[M+H-176]^+$ ), 220 ( $[237-NH_3]^+$ ), 192 ( $[237-CONH_3]^+$ ) |
| <i>N</i> -glucuronide<br>10,11-epoxide <sup>a</sup> | 429 ( $[M+H]^+$ ), 411 ( $[M+H-H_2O]^+$ ), 295 ( $[M+H-134]^+$ ), 253 ( $[M+H-176]^+$ ), 236 ( $[253-NH_3]^+$ ), 210 ( $[253-CONH]^+$ ), 180 ( $[210-CH_2O]^+$ )                         |
| <i>O</i> -sulfonates <sup>b</sup>                   | 333 ( $[M+H]^+$ ), 253 ( $[M+H-SO_3]^+$ ), 210 ( $[253-CONH]^+$ )                                                                                                                        |
| GSH adduct <sup>c</sup>                             | 542 ( $[M+H]^+$ ), 467 ( $[M+H-glycine]^+$ ), 413 ( $[M+H-pyroglutamate]^+$ )                                                                                                            |

<sup>a</sup>Neutral losses of 92 amu and 134 amu, attributable to fissions within the glucuronic acid moiety, are characteristic of an *N*-glucuronide.<sup>1</sup>

<sup>b</sup>Two *O*-sulfonates of **1** (regiochemistry unknown) were resolved. They yielded identical mass spectra.

<sup>c</sup>Regiochemistry unknown.

**Table S2.** Mass spectra of metabolites of **5a**

| Metabolite                             | Mass spectrum ( <i>m/z</i> )                                                                                                                                                                                                                                                                             |
|----------------------------------------|----------------------------------------------------------------------------------------------------------------------------------------------------------------------------------------------------------------------------------------------------------------------------------------------------------|
| 10,11-epoxide                          | 271 ([M+H] <sup>+</sup> ), 254 ([M+H-NH <sub>3</sub> ] <sup>+</sup> ), 228 ([M+H-CONH] <sup>+</sup> ), 198 ([228-CH <sub>2</sub> O] <sup>+</sup> )                                                                                                                                                       |
| <i>N</i> -glucuronide                  | 431 ([M+H] <sup>+</sup> ), 413 ([M+H-H <sub>2</sub> O] <sup>+</sup> ), 395 ([M+H-2H <sub>2</sub> O] <sup>+</sup> ), 321 ([413-92] <sup>+</sup> ), 297 ([M+H-134] <sup>+</sup> ), 255 ([M+H-176] <sup>+</sup> ), 238 ([255-NH <sub>3</sub> ] <sup>+</sup> ), 210 ([255-CONH <sub>3</sub> ] <sup>+</sup> ) |
| <i>N</i> -glucuronide<br>10,11-epoxide | 447 ([M+H] <sup>+</sup> ), 429 ([M+H-H <sub>2</sub> O] <sup>+</sup> ), 313 ([M+H-134] <sup>+</sup> ), 271 ([M+H-176] <sup>+</sup> ), 254 ([271-NH <sub>3</sub> ] <sup>+</sup> ), 228 ([271-CONH] <sup>+</sup> ), 198 ([228-CH <sub>2</sub> O] <sup>+</sup> )                                             |
| <i>O</i> -sulfonate <sup>a</sup>       | 351 ([M+H] <sup>+</sup> ), 271 ([M+H-SO <sub>3</sub> ] <sup>+</sup> ), 228 ([271-CONH] <sup>+</sup> )                                                                                                                                                                                                    |

<sup>a</sup>Regiochemistry of *O*-sulfonate unknown.**Table S3.** Mass spectra of metabolites of **5b**

| Metabolite                             | Mass spectrum ( <i>m/z</i> )                                                                                                                                                                                                                                                                             |
|----------------------------------------|----------------------------------------------------------------------------------------------------------------------------------------------------------------------------------------------------------------------------------------------------------------------------------------------------------|
| 10,11-epoxide                          | 289 ([M+H] <sup>+</sup> ), 272 ([M+H-NH <sub>3</sub> ] <sup>+</sup> ), 246 ([M+H-CONH] <sup>+</sup> ), 216 ([246-CH <sub>2</sub> O] <sup>+</sup> )                                                                                                                                                       |
| <i>N</i> -glucuronide                  | 449 ([M+H] <sup>+</sup> ), 431 ([M+H-H <sub>2</sub> O] <sup>+</sup> ), 413 ([M+H-2H <sub>2</sub> O] <sup>+</sup> ), 339 ([431-92] <sup>+</sup> ), 315 ([M+H-134] <sup>+</sup> ), 273 ([M+H-176] <sup>+</sup> ), 256 ([273-NH <sub>3</sub> ] <sup>+</sup> ), 228 ([273-CONH <sub>3</sub> ] <sup>+</sup> ) |
| <i>N</i> -glucuronide<br>10,11-epoxide | 465 ([M+H] <sup>+</sup> ), 447 ([M+H-H <sub>2</sub> O] <sup>+</sup> ), 331 ([M+H-134] <sup>+</sup> ), 289 ([M+H-176] <sup>+</sup> ), 272 ([289-NH <sub>3</sub> ] <sup>+</sup> ), 246 ([289-CONH] <sup>+</sup> ), 216 ([246-CH <sub>2</sub> O] <sup>+</sup> )                                             |

**Table S4.** Mass spectra of metabolites of **5c**

| Metabolite                             | Mass spectrum ( $m/z$ ) <sup>a</sup>                                                                                                                                                                                                                                                                     |
|----------------------------------------|----------------------------------------------------------------------------------------------------------------------------------------------------------------------------------------------------------------------------------------------------------------------------------------------------------|
| 10,11-epoxide                          | 287 ([M+H] <sup>+</sup> ), 270 ([M+H-NH <sub>3</sub> ] <sup>+</sup> ), 244 ([M+H-CONH] <sup>+</sup> ), 214 ([244-CH <sub>2</sub> O] <sup>+</sup> )                                                                                                                                                       |
| <i>N</i> -glucuronide                  | 447 ([M+H] <sup>+</sup> ), 429 ([M+H-H <sub>2</sub> O] <sup>+</sup> ), 411 ([M+H-2H <sub>2</sub> O] <sup>+</sup> ), 337 ([429-92] <sup>+</sup> ), 313 ([M+H-134] <sup>+</sup> ), 271 ([M+H-176] <sup>+</sup> ), 254 ([271-NH <sub>3</sub> ] <sup>+</sup> ), 226 ([271-CONH <sub>3</sub> ] <sup>+</sup> ) |
| <i>N</i> -glucuronide<br>10,11-epoxide | 463 ([M+H] <sup>+</sup> ), 445 ([M+H-H <sub>2</sub> O] <sup>+</sup> ), 329 ([M+H-134] <sup>+</sup> ), 287 ([M+H-176] <sup>+</sup> ), 270 ([287-NH <sub>3</sub> ] <sup>+</sup> ), 244 ([287-CONH] <sup>+</sup> ), 214 ([244-CH <sub>2</sub> O] <sup>+</sup> )                                             |

<sup>a</sup>Values for <sup>35</sup>Cl isotope form.**Table S5.** Mass spectra of metabolites of **5d**

| Metabolite                             | Mass spectrum ( $m/z$ ) <sup>a</sup>                                                                                                                                                                                                                                                                     |
|----------------------------------------|----------------------------------------------------------------------------------------------------------------------------------------------------------------------------------------------------------------------------------------------------------------------------------------------------------|
| 10,11-epoxide                          | 321 ([M+H] <sup>+</sup> ), 304 ([M+H-NH <sub>3</sub> ] <sup>+</sup> ), 278 ([M+H-CONH] <sup>+</sup> ), 248 ([278-CH <sub>2</sub> O] <sup>+</sup> )                                                                                                                                                       |
| <i>N</i> -glucuronide                  | 481 ([M+H] <sup>+</sup> ), 463 ([M+H-H <sub>2</sub> O] <sup>+</sup> ), 445 ([M+H-2H <sub>2</sub> O] <sup>+</sup> ), 371 ([463-92] <sup>+</sup> ), 347 ([M+H-134] <sup>+</sup> ), 305 ([M+H-176] <sup>+</sup> ), 288 ([305-NH <sub>3</sub> ] <sup>+</sup> ), 260 ([305-CONH <sub>3</sub> ] <sup>+</sup> ) |
| <i>N</i> -glucuronide<br>10,11-epoxide | 497 ([M+H] <sup>+</sup> ), 479 ([M+H-H <sub>2</sub> O] <sup>+</sup> ), 363 ([M+H-134] <sup>+</sup> ), 321 ([M+H-176] <sup>+</sup> ), 304 ([321-NH <sub>3</sub> ] <sup>+</sup> ), 278 ([321-CONH] <sup>+</sup> ), 248 ([278-CH <sub>2</sub> O] <sup>+</sup> )                                             |

<sup>a</sup>Values for <sup>35</sup>Cl<sub>2</sub> isotope form.

**Table S6.** Mass spectra of metabolites of **5e**

| Metabolite                             | Mass spectrum ( $m/z$ ) <sup>a</sup>                                                                                                                                                                                                                                                                     |
|----------------------------------------|----------------------------------------------------------------------------------------------------------------------------------------------------------------------------------------------------------------------------------------------------------------------------------------------------------|
| 10,11-epoxide                          | 331 ([M+H] <sup>+</sup> ), 314 ([M+H-NH <sub>3</sub> ] <sup>+</sup> ), 288 ([M+H-CONH] <sup>+</sup> ), 258 ([288-CH <sub>2</sub> O] <sup>+</sup> )                                                                                                                                                       |
| <i>N</i> -glucuronide                  | 491 ([M+H] <sup>+</sup> ), 473 ([M+H-H <sub>2</sub> O] <sup>+</sup> ), 455 ([M+H-2H <sub>2</sub> O] <sup>+</sup> ), 381 ([473-92] <sup>+</sup> ), 357 ([M+H-134] <sup>+</sup> ), 315 ([M+H-176] <sup>+</sup> ), 298 ([315-NH <sub>3</sub> ] <sup>+</sup> ), 270 ([315-CONH <sub>3</sub> ] <sup>+</sup> ) |
| <i>N</i> -glucuronide<br>10,11-epoxide | 507 ([M+H] <sup>+</sup> ), 489 ([M+H-H <sub>2</sub> O] <sup>+</sup> ), 373 ([M+H-134] <sup>+</sup> ), 331 ([M+H-176] <sup>+</sup> ), 314 ([331-NH <sub>3</sub> ] <sup>+</sup> ), 288 ([331-CONH] <sup>+</sup> ), 258 ([288-CH <sub>2</sub> O] <sup>+</sup> )                                             |

<sup>a</sup>Values for <sup>79</sup>Br isotope form.**Table S7.** Mass spectra of metabolites of **5f**

| Metabolite                             | Mass spectrum ( $m/z$ ) <sup>a</sup>                                                                                                                                                                                                                                                                     |
|----------------------------------------|----------------------------------------------------------------------------------------------------------------------------------------------------------------------------------------------------------------------------------------------------------------------------------------------------------|
| 10,11-epoxide                          | 411 ([M+H] <sup>+</sup> ), 394 ([M+H-NH <sub>3</sub> ] <sup>+</sup> ), 368 ([M+H-CONH] <sup>+</sup> ), 338 ([368-CH <sub>2</sub> O] <sup>+</sup> )                                                                                                                                                       |
| <i>N</i> -glucuronide                  | 571 ([M+H] <sup>+</sup> ), 553 ([M+H-H <sub>2</sub> O] <sup>+</sup> ), 535 ([M+H-2H <sub>2</sub> O] <sup>+</sup> ), 461 ([553-92] <sup>+</sup> ), 437 ([M+H-134] <sup>+</sup> ), 395 ([M+H-176] <sup>+</sup> ), 378 ([395-NH <sub>3</sub> ] <sup>+</sup> ), 350 ([395-CONH <sub>3</sub> ] <sup>+</sup> ) |
| <i>N</i> -glucuronide<br>10,11-epoxide | 587 ([M+H] <sup>+</sup> ), 569 ([M+H-H <sub>2</sub> O] <sup>+</sup> ), 453 ([M+H-134] <sup>+</sup> ), 411 ([M+H-176] <sup>+</sup> ), 394 ([411-NH <sub>3</sub> ] <sup>+</sup> ), 368 ([411-CONH] <sup>+</sup> ), 338 ([368-CH <sub>2</sub> O] <sup>+</sup> )                                             |

<sup>a</sup>Values for <sup>79</sup>Br-<sup>81</sup>Br isotope form.

## Reference

1. Breyer-Pfaff, U.; Wachsmuth, H. Tertiary *N*-glucuronides of clozapine and its metabolite desmethylozapine in patient urine. *Drug Metab. Dispos.* **2001**, *29*, 1343-1348.
